# Supplementary material for: In Silico Evaluation of Bioactive Compounds of Artemisia pallens Targeting the Efflux Protein of Multidrug-Resistant Acinetobacter baumannii (LAC-4 Strain)
Source: MDPI journal article supplement (doi:10.3390/molecules27165188), 2022-08-15
Supplement: s1 [file s1]

## Supplementary Table

**Table S1:** List of extricated compounds attained from GC–MS Assay

| Sl. no | Retention time | Name of the compound                                                                                                        | Peak area (%) |
|--------|----------------|-----------------------------------------------------------------------------------------------------------------------------|---------------|
| 1      | RT-10.164      | Lilac alcohol A                                                                                                             | 7.29          |
| 2      | RT-11.108      | 3,5-Dimethylanisole                                                                                                         | 1.81          |
| 3      | RT-11.797      | Davana ether                                                                                                                | 2.79          |
| 4      | RT-12.564      | 5-Hepten-3-one, 2-(5-ethenyltetrahydro-5-methyl-2-furanyl)-6-methyl-, [2S-[2.alpha.(R*),5.alpha.]]-                         | 2.76          |
| 5      | RT-12.652      | 1H-Cycloprop[e]azulen-7-ol, decahydro-1,1,7-trimethyl-4-methylene-, [1ar-(1a.alpha.,4a.alpha.,7.beta.,7a.beta.,7b.alpha.)]- | 3.03          |
| 6      | RT-13.163      | 5,7-Octadien-3-ol, 2,4,4,7-tetramethyl-, (E)-                                                                               | 1.08          |
| 7      | RT-13.275      | 1-Cyclopentene-1-methanol, 2-methyl-5-(1-methylethyl)-                                                                      | 1.36          |
| 8      | RT-13.619      | Silane, trimethyl(methylenecyclopropyl)-                                                                                    | 1.41          |
| 9      | RT-13.663      | 7-Oxabicyclo[2.2.1]heptane, 1-methyl-4-(1-methylethyl)-                                                                     | 0.97          |
| 10     | RT-13.863      | Lilac alcohol C                                                                                                             | 32.77         |
| 11     | RT-14.086      | 4-((1E)-3-Hydroxy-1-propenyl)-2-methoxyphenol                                                                               | 1.38          |
| 12     | RT-15.752      | cis-Z-.alpha.-Bisabolene epoxide                                                                                            | 0.96          |
| 13     | RT-15.974      | n-Hexadecanoic acid                                                                                                         | 7.92          |
| 14     | RT-17.163      | Phytol                                                                                                                      | 1.67          |
| 15     | RT-17.341      | 9,12-Octadecadienoic acid (Z,Z)-                                                                                            | 2.94          |
| 16     | RT-17.430      | Naphtho[1,2-b]furan-2,6(3H,4H)-dione, 3a,5,5a,9,9a,9b-hexahydro-9-hydroxy-3,5a,9-trimethyl-                                 | 15.14         |
| 17     | RT-17.496      | Benzoic acid, 3,5-bis(1,1-dimethylethyl)-4-hydroxy-, methyl ester                                                           | 1.65          |
| 18     | RT-17.541      | 16-Methyloxacyclohexadeca-3,5-dien-2-one                                                                                    | 1.90          |
| 19     | RT-18.274      | Octacosyl acetate                                                                                                           | 1.97          |
| 20     | RT-18.641      | Ethyl 4-acetylbenzoate                                                                                                      | 1.03          |
| 21     | RT-19.007      | Cyclooctaneacetic acid, 2-oxo-                                                                                              | 1.37          |
| 22     | RT-20.007      | Hexadecanoic acid, 2-hydroxy-1-(hydroxymethyl)ethyl ester                                                                   | 1.73          |
| 23     | RT-21.174      | 1-Nonadecene                                                                                                                | 2.67          |
| 24     | RT-22.340      | Adamantane-1,3-diol                                                                                                         | 0.89          |
| 25     | RT-22.396      | Heptadecane                                                                                                                 | 1.51          |

## Supplementary Figure

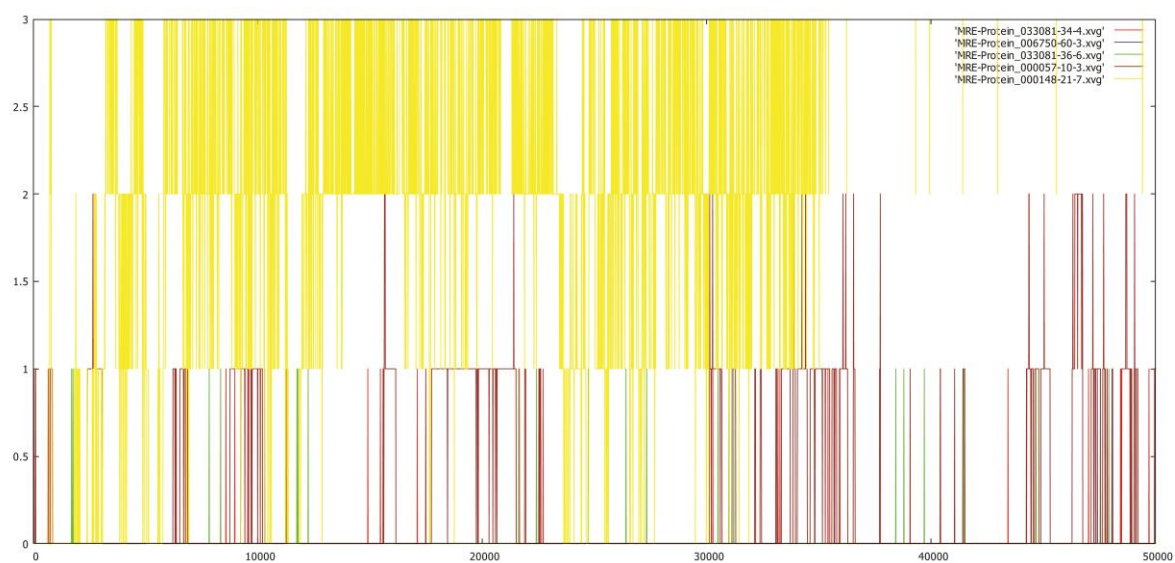

**Figure S1:** Total number of inter-molecular hydrogen bond (H\_bond) interactions between the ligands (033081-34-4, 006750-60-3, 033081-36-6, 000057-10-3 and 000148-21-7 efflux protein of *A. baumannii* (LAC-4))
